# Supplementary material for: Hydrothermal-assisted biomimetic synthesis of a brush-like Hap/PAN composite and its application for decontaminating metal ions
Source: Royal Society of Chemistry journal article supplement (doi:10.1039/c5ra20463a), 2016-01-01
Supplement: c5ra20463a1.pdf [file c5ra20463a1.pdf]

## Supporting Information

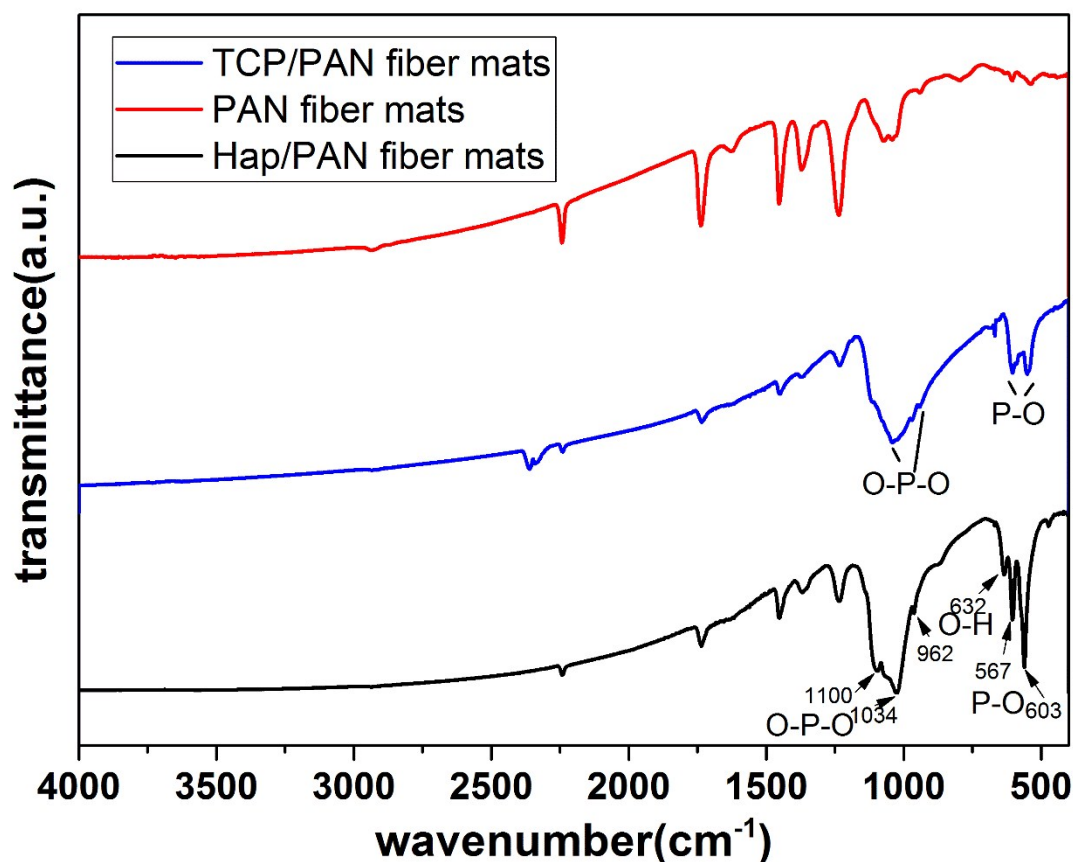

S1: the FTIR spectra of TCP/PAN fiber mats, PAN fiber mats and Hap/PAN fiber mats.

The FTIR spectrum corresponding to PAN fiber mats is functioned as a contrast with the TCP/PAN fiber mats and Hap/PAN fiber mats. From the spectrum of Hap/PAN composite fiber mats, we can see that the bands at 567, 603 and 962 cm<sup>-1</sup> are derived from the phosphate modes (O-P-O) and the strong bands at 1034 and 1100 are assigned to the P-O stretching vibration of PO<sub>3</sub><sup>4-</sup>, standing for phosphate mode. The bending mode of the OH<sup>-</sup> appear at 632 cm<sup>-1</sup>. As seen from the spectra in Fig. S1, TCP and Hap existed in the TCP/PAN fiber mats and Hap/PAN fiber mats, respectively. Although the groups of Hap can be observed in the spectra, the adsorption peaks of PAN located at 1100, 1034, 603 and 632 cm<sup>-1</sup> can be found somewhat, which interferes in the conclusion of the existence of Hap.
